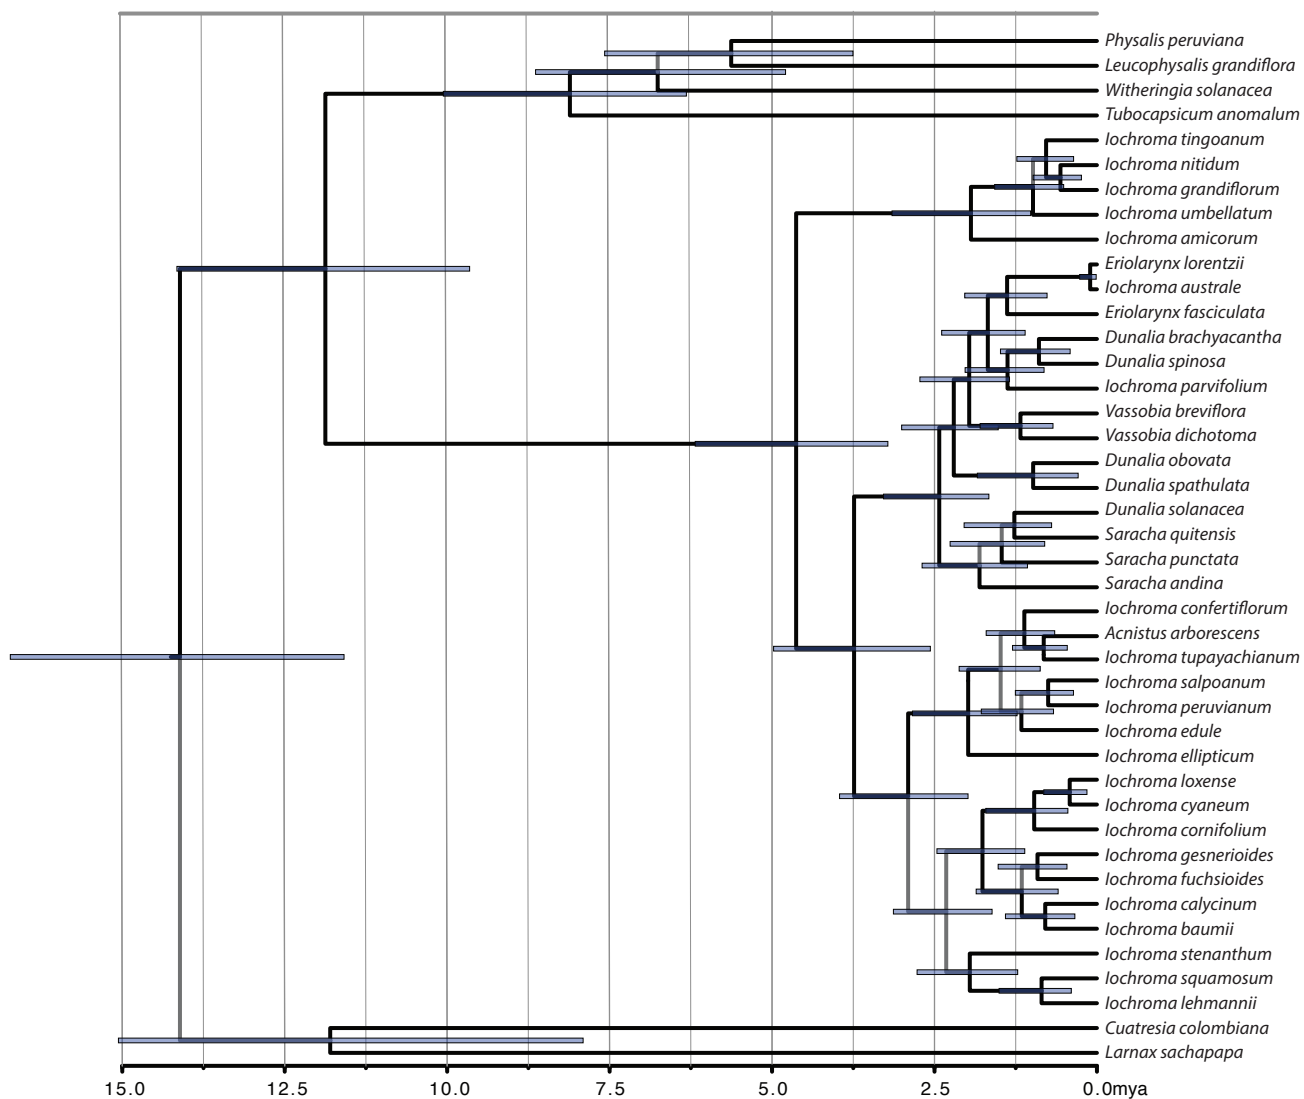

**Fig. S1.** Timetree of lochrominae. Maximum clade credibility tree from BEAST analysis. 95% highest posterior densities for each node depth are shown with the light blue bars. Branches with less than 95% posterior probability (PP) are colored in gray and those with greater PP values are in black. Time is indicated in millions of years (mya) along the x-axis.

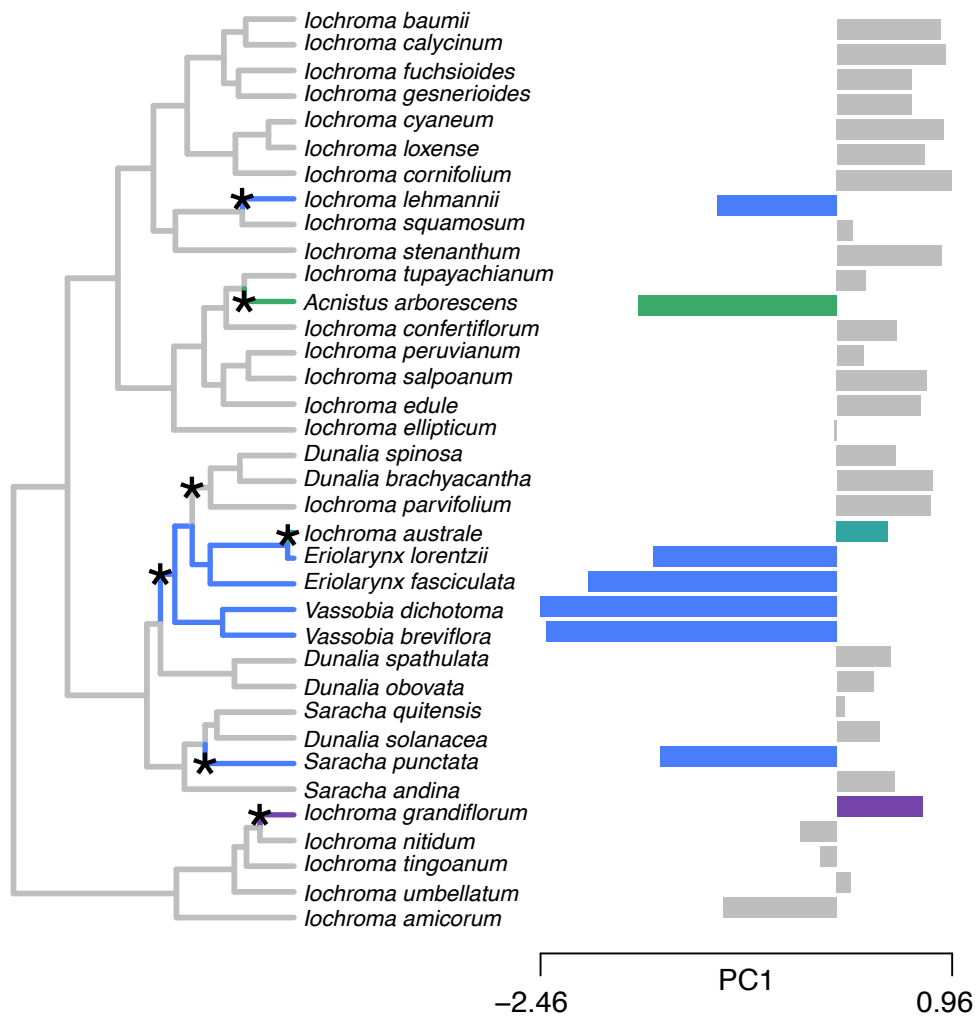

**Fig. S2.** Estimate of regime shifts on MCC tree. Significant shifts are indicated with black asterisks and can be either transitions to new shape regimes or reversals to the ancestral regime. Distinct regimes are indicated with different colors; here there are 5 estimated regimes. Analysis is based on PC1 values, plotted on the right.

**Table S1.** Pollinator data for lochrominae taxa. Quantitative measures of relative hummingbird importance are listed where available. For the remaining taxa, principal pollinator was coded from field observations. Voucher specimens are listed for personal observations.

| Species                     | Rel. hummingbird importance | Principal pollinator | Source                         |
|-----------------------------|-----------------------------|----------------------|--------------------------------|
| <i>Acnistus arborescens</i> | 0                           | insect               | 1                              |
| <i>Dunalia spathulata</i>   | NA                          | insect               | pers. obs.: Smith 454 (WIS)    |
| <i>D. spinosa</i>           | NA                          | hummingbird          | 2, pers. obs.: Smith 512 (WIS) |
| <i>Eriolarynx lorentzii</i> | NA                          | insect               | pers. obs.: Smith 532 (WIS)    |
| <i>Lochroma australe</i>    | NA                          | mixed                | pers. obs.: Smith 390 (WIS)    |
| <i>I. calycinum</i>         | 0.74                        | hummingbird          | 1                              |
| <i>I. confertiflorum</i>    | 0.78                        | hummingbird          | 1                              |
| <i>I. cornifolium</i>       | 0.96                        | hummingbird          | 1                              |
| <i>I. cyaneum</i>           | 0.84                        | hummingbird          | 1                              |
| <i>I. edule</i>             | 0.99                        | hummingbird          | 1                              |
| <i>I. ellipticum</i>        | 0                           | insect               | 1                              |
| <i>I. fuchsoides</i>        | 0.7                         | mixed                | 1                              |
| <i>I. gesnerioides</i>      | 0.9                         | hummingbird          | 1                              |
| <i>I. lehmannii</i>         | 0.99                        | hummingbird          | 1                              |
| <i>I. loxense</i>           | 0.89                        | hummingbird          | 1                              |
| <i>I. parvifolium</i>       | 0.7                         | mixed                | 1                              |
| <i>I. peruvianum</i>        | 0.44                        | mixed                | 1                              |
| <i>I. stenanthum</i>        | 0.99                        | hummingbird          | 1                              |
| <i>I. umbellatum</i>        | 0.32                        | mixed                | 1                              |
| <i>Saracha andina</i>       | NA                          | hummingbird          | 3                              |
| <i>S. quitensis</i>         | NA                          | hummingbird          | 4                              |
| <i>Vassobia breviflora</i>  | 0                           | insect               | 5                              |

## References:

- <sup>1</sup>Smith, S. D., S. J. Hall, P. R. S. Izquierdo and D. A. Baum. 2008. Comparative pollination biology of sympatric and allopatric Andean *Lochroma* (Solanaceae). *Annals of the Missouri Botanical Garden* 95: 600-617.
- <sup>2</sup>Reyes, D. 2017. Los picaflores de Chile. [www.educarchile.cl/ech/pro/app/detalle?ID=226246](http://www.educarchile.cl/ech/pro/app/detalle?ID=226246)
- <sup>3</sup>Fernandez-Hilario, R. and S. D. Smith. 2017. A new species of *Saracha* (Solanaceae) from the Central Andes of Peru. *Phytokeys* 85: 31–43.
- <sup>4</sup>Alvarez, A. 1996. Systematics of *Saracha* (Solanaceae). Master's thesis, University of Missouri-St. Louis, St. Louis, Missouri, USA.
- <sup>5</sup>Taura, H. M. and S. Laroca. 2004. Biología da polinização: interações entre as abelhas (Hym., Apoidea) e as flores de *Vassobia breviflora* (Solanaceae). *Acta Biológica Paranaense* 33:143-162.

**Table S2.** Parameter estimates from PGLS analyses. “Poll” denotes relative hummingbird importance and the PCs correspond to the shape PCs (Fig. 1). The “No Vb” analysis has the outlier *Vassobia breviflora* removed from the dataset (see text). Values of *P* less than 0.05 are bolded. All analyses were conducted using the MCC tree (Fig. S1) and repeated with three models: the Brownian motion (BM) model, the Ornstein-Uhlenbeck (OU) model, and the TIPS model. The estimated  $\alpha$  parameter is provided for OU models.

| Dataset | Formula    | Model | df | Coefficient | S.E. | t-value | <i>P</i>     | $\alpha$ | $\sigma$ | AIC    |
|---------|------------|-------|----|-------------|------|---------|--------------|----------|----------|--------|
| Full    | PC1~ Poll  | BM    | 16 | 0.30        | 0.08 | 3.58    | <b>0.003</b> | -        | 0.17     | -11.86 |
|         |            | OU    | 16 | 0.29        | 0.08 | 3.44    | <b>0.004</b> | 0.18     | 0.16     | -9.98  |
|         |            | TIPS  | 16 | 0.29        | 0.08 | 3.52    | <b>0.003</b> | -        | 0.12     | -10.92 |
| No Vb   | PC1~ Poll  | BM    | 15 | 0.22        | 0.08 | 2.84    | <b>0.01</b>  | -        | 0.15     | -14.47 |
|         |            | OU    | 15 | 0.20        | 0.08 | 2.50    | <b>0.03</b>  | 0.38     | 0.11     | -12.92 |
|         |            | TIPS  | 15 | 0.20        | 0.08 | 2.51    | <b>0.03</b>  | -        | 0.10     | -14.13 |
| Full    | PC2 ~ Poll | BM    | 16 | -0.01       | 0.05 | -0.17   | 0.86         | -        | 0.10     | -27.09 |
|         |            | OU    | 16 | -0.01       | 0.05 | -0.17   | 0.86         | 0.00     | 330      | -25.09 |
|         |            | TIPS  | 16 | -0.02       | 0.05 | -0.53   | 0.60         | -        | 0.08     | -22.64 |
| No Vb   | PC2 ~ Poll | BM    | 15 | -0.06       | 0.04 | -1.36   | 0.20         | -        | 0.08     | -30.71 |
|         |            | OU    | 15 | -0.07       | 0.04 | -1.68   | 0.12         | 0.32     | 0.06     | -29.40 |
|         |            | TIPS  | 15 | -0.11       | 0.04 | -2.45   | 0.03         | -        | 0.05     | -29.63 |

**Table S3.** Phylogenetic ANOVA with pollinator system as a categorical variable. “Poll” denotes relative hummingbird importance and the PCs correspond to the shape PCs (Fig. 1). The set of 22 taxa used in this analysis along with their coding is given in Table S1. Values of *P* less than 0.05 are bolded. All analyses were conducted using the MCC tree (Fig. S1) and repeated with three models: the Brownian motion (BM) model, the Ornstein-Uhlenbeck (OU) model, and the TIPS model. The estimated  $\alpha$  parameter is provided for OU models.

| Formula    | Model | df    | F     | <i>P</i>         | $\alpha$ | $\sigma$ | AIC    |
|------------|-------|-------|-------|------------------|----------|----------|--------|
| PC1~ Poll  | BM    | 2, 19 | 47.00 | <b>&gt;0.001</b> | -        | 0.16     | -17.41 |
|            | OU    | 2, 19 | 22.32 | <b>&gt;0.001</b> | 0.54     | 0.11     | -15.69 |
|            | TIPS  | 2, 19 | 9.25  | <b>0.002</b>     | -        | 0.11     | -16.97 |
| PC2 ~ Poll | BM    | 2, 19 | 0.31  | 0.73             | -        | 0.10     | -39.99 |
|            | OU    | 2, 19 | 0.33  | 0.72             | 0.23     | 0.08     | -35.38 |
|            | TIPS  | 2, 19 | 0.74  | 0.49             | -        | 0.07     | -34.23 |

**Table S4.** Inclusion in a regime shift. Each species is listed along with the frequency with which it was associated with a shift across the 100-tree sample. For example, the two *Vassobia* species were estimated to be part of a different regime from the ancestral (background) regime in all of the 100 trees. Those that were not involved in any shift (have values of zero) are inferred to have retained the ancestral regime across all of the trees.

|                                |     |
|--------------------------------|-----|
| <i>Vassobia breviflora</i>     | 100 |
| <i>Vassobia dichotoma</i>      | 100 |
| <i>Acnistus arborescens</i>    | 95  |
| <i>Eriolarynx fasciculata</i>  | 95  |
| <i>Eriolarynx lorentzii</i>    | 95  |
| <i>Saracha punctata</i>        | 95  |
| <i>lochroma australe</i>       | 94  |
| <i>Dunalia spinosa</i>         | 92  |
| <i>lochroma parvifolium</i>    | 92  |
| <i>lochroma lehmannii</i>      | 86  |
| <i>lochroma grandiflorum</i>   | 62  |
| <i>Dunalia brachyacantha</i>   | 31  |
| <i>lochroma amicorum</i>       | 1   |
| <i>Dunalia obovata</i>         | 0   |
| <i>Dunalia solanacea</i>       | 0   |
| <i>Dunalia spathulata</i>      | 0   |
| <i>lochroma baumii</i>         | 0   |
| <i>lochroma calycinum</i>      | 0   |
| <i>lochroma confertiflorum</i> | 0   |
| <i>lochroma cornifolium</i>    | 0   |
| <i>lochroma cyaneum</i>        | 0   |
| <i>lochroma edule</i>          | 0   |
| <i>lochroma ellipticum</i>     | 0   |
| <i>lochroma fuchsioides</i>    | 0   |
| <i>lochroma gesnerioides</i>   | 0   |
| <i>lochroma loxense</i>        | 0   |
| <i>lochroma nitidum</i>        | 0   |
| <i>lochroma peruvianum</i>     | 0   |
| <i>lochroma salpoanum</i>      | 0   |
| <i>lochroma squamosum</i>      | 0   |
| <i>lochroma stenanthum</i>     | 0   |
| <i>lochroma tingoanum</i>      | 0   |
| <i>lochroma tupayachianum</i>  | 0   |
| <i>lochroma umbellatum</i>     | 0   |
| <i>Saracha andina</i>          | 0   |
| <i>Saracha quitensis</i>       | 0   |

**Table S5.** Distinct convergent regimes estimated by I1ou across the 100-tree sample. These include both cases where independent lineages acquired the same derived regime (e.g., the blue lineages in Fig. S2) and where lineages reverted to the ancestral (background) regime (e.g., the *D. spinosa*+*D. brachyachantha*+*I. parvifolium* clade in Fig. S2). Each column in the table represents a distinct regime with gray squares denoting inclusion of the taxon in the regime. The number of taxa in each regime and the number of times the regime was inferred among the 100-tree sample is given at the bottom. The first three regimes, with large numbers of taxa, correspond to cases where taxa converged to the ancestral regime. *I. australe* is not included in the table because it was never inferred to be part of a convergent regime (i.e., it was always inferred to have shifted to its own unique regime).

| Regime                         | 1  | 2  | 3  | 4 | 5  | 6  | 7  | 8 | 9  | 10 | 11 | 12 | 13 | 14 | 15 | 16 | 17 |
|--------------------------------|----|----|----|---|----|----|----|---|----|----|----|----|----|----|----|----|----|
| <i>Acnistus arborescens</i>    |    |    |    |   |    |    |    |   |    |    |    |    |    |    |    |    |    |
| <i>Dunalia brachyachantha</i>  |    |    |    |   |    |    |    |   |    |    |    |    |    |    |    |    |    |
| <i>Dunalia obovata</i>         |    |    |    |   |    |    |    |   |    |    |    |    |    |    |    |    |    |
| <i>Dunalia solanacea</i>       |    |    |    |   |    |    |    |   |    |    |    |    |    |    |    |    |    |
| <i>Dunalia spathulata</i>      |    |    |    |   |    |    |    |   |    |    |    |    |    |    |    |    |    |
| <i>Dunalia spinosa</i>         |    |    |    |   |    |    |    |   |    |    |    |    |    |    |    |    |    |
| <i>Eriolarynx fasciculata</i>  |    |    |    |   |    |    |    |   |    |    |    |    |    |    |    |    |    |
| <i>Eriolarynx lorentzii</i>    |    |    |    |   |    |    |    |   |    |    |    |    |    |    |    |    |    |
| <i>Lochroma amicorum</i>       |    |    |    |   |    |    |    |   |    |    |    |    |    |    |    |    |    |
| <i>Lochroma baumii</i>         |    |    |    |   |    |    |    |   |    |    |    |    |    |    |    |    |    |
| <i>Lochroma calycinum</i>      |    |    |    |   |    |    |    |   |    |    |    |    |    |    |    |    |    |
| <i>Lochroma confertiflorum</i> |    |    |    |   |    |    |    |   |    |    |    |    |    |    |    |    |    |
| <i>Lochroma cornifolium</i>    |    |    |    |   |    |    |    |   |    |    |    |    |    |    |    |    |    |
| <i>Lochroma cyaneum</i>        |    |    |    |   |    |    |    |   |    |    |    |    |    |    |    |    |    |
| <i>Lochroma edule</i>          |    |    |    |   |    |    |    |   |    |    |    |    |    |    |    |    |    |
| <i>Lochroma ellipticum</i>     |    |    |    |   |    |    |    |   |    |    |    |    |    |    |    |    |    |
| <i>Lochroma fuchsioides</i>    |    |    |    |   |    |    |    |   |    |    |    |    |    |    |    |    |    |
| <i>Lochroma gesnerioides</i>   |    |    |    |   |    |    |    |   |    |    |    |    |    |    |    |    |    |
| <i>Lochroma grandiflorum</i>   |    |    |    |   |    |    |    |   |    |    |    |    |    |    |    |    |    |
| <i>Lochroma lehmannii</i>      |    |    |    |   |    |    |    |   |    |    |    |    |    |    |    |    |    |
| <i>Lochroma loxense</i>        |    |    |    |   |    |    |    |   |    |    |    |    |    |    |    |    |    |
| <i>Lochroma nitidum</i>        |    |    |    |   |    |    |    |   |    |    |    |    |    |    |    |    |    |
| <i>Lochroma parvifolium</i>    |    |    |    |   |    |    |    |   |    |    |    |    |    |    |    |    |    |
| <i>Lochroma peruvianum</i>     |    |    |    |   |    |    |    |   |    |    |    |    |    |    |    |    |    |
| <i>Lochroma salpoanum</i>      |    |    |    |   |    |    |    |   |    |    |    |    |    |    |    |    |    |
| <i>Lochroma squamosum</i>      |    |    |    |   |    |    |    |   |    |    |    |    |    |    |    |    |    |
| <i>Lochroma stenanthum</i>     |    |    |    |   |    |    |    |   |    |    |    |    |    |    |    |    |    |
| <i>Lochroma tingoanum</i>      |    |    |    |   |    |    |    |   |    |    |    |    |    |    |    |    |    |
| <i>Lochroma tupayachianum</i>  |    |    |    |   |    |    |    |   |    |    |    |    |    |    |    |    |    |
| <i>Lochroma umbellatum</i>     |    |    |    |   |    |    |    |   |    |    |    |    |    |    |    |    |    |
| <i>Saracha andina</i>          |    |    |    |   |    |    |    |   |    |    |    |    |    |    |    |    |    |
| <i>Saracha punctata</i>        |    |    |    |   |    |    |    |   |    |    |    |    |    |    |    |    |    |
| <i>Saracha quitensis</i>       |    |    |    |   |    |    |    |   |    |    |    |    |    |    |    |    |    |
| <i>Vassobia breviflora</i>     |    |    |    |   |    |    |    |   |    |    |    |    |    |    |    |    |    |
| <i>Vassobia dichotoma</i>      |    |    |    |   |    |    |    |   |    |    |    |    |    |    |    |    |    |
| Number of taxa included        | 27 | 28 | 29 | 4 | 3  | 6  | 5  | 5 | 4  | 2  | 2  | 7  | 6  | 4  | 3  | 2  | 2  |
| Number of occurrences          | 41 | 15 | 5  | 3 | 28 | 31 | 28 | 9 | 23 | 7  | 1  | 2  | 1  | 1  | 2  | 1  | 19 |
